# Supplementary material for: Development and validation of a simple lupus severity index using ACR criteria for classification of SLE
Source: PubMed Central journal article supplement — Lupus Sci Med. 2016 Mar 10;3(1):e000136. doi: 10.1136/lupus-2015-000136 (PMC4800735; doi:10.1136/lupus-2015-000136), 2016-03-10
Supplement: lupus-2015-000136supp_tables.pdf [file lupus-2015-000136supp_tables.pdf]

## SUPPLEMENTARY MATERIAL

**Supplementary Table 1: Calculation of Katz Severity Index**

| Component                                                   | Points |   |
|-------------------------------------------------------------|--------|---|
| lowest recorded hematocrit to date                          | 30-37% | 1 |
|                                                             | <30%   | 2 |
| highest recorded creatinine to date                         | 1.3-3  | 1 |
|                                                             | > 3    | 2 |
| # of ACR criteria for SLE satisfied to date                 | 4-6    | 1 |
|                                                             | > 6    | 2 |
| history of proteinuria                                      | ≥ 2+   | 1 |
| history of cerebritis                                       |        | 2 |
| history of pulmonary disease                                |        | 2 |
| Diffuse Proliferative Glomerulonephritis<br>(Biopsy Proven) |        | 2 |
| <b>Maximum Possible Score = 13</b>                          |        |   |

**Supplementary Table 2: Item weightings for Severity Index**

| Criterion        | Sub-criterion           | Coefficient/<br>Weighting |
|------------------|-------------------------|---------------------------|
| Malar Rash       |                         | 0.020                     |
| Discoid Rash     |                         | -0.169                    |
| Photosensitivity |                         | -0.210                    |
| Oral Ulcer       |                         | 0.093                     |
| Arthritis        |                         | -0.289                    |
| Serositis        | <i>Pericarditis</i>     | 0.231                     |
|                  | <i>Pleuritis</i>        | 0.206                     |
| Hematological    | <i>Hemolytic Anemia</i> | 0.529                     |
|                  | <i>Leukopenia</i>       | -0.053                    |
|                  | <i>Lymphopenia</i>      | -0.033                    |
|                  | <i>Thrombocytopenia</i> | 0.144                     |
| Renal            |                         | 1.34                      |
| Neurological     | <i>Seizures</i>         | 0.623                     |
|                  | <i>Psychosis</i>        | 0.142                     |
| Immunological    |                         | 0.447                     |

## SUPPLEMENTARY MATERIAL

**Supplementary Table 3.1: Prevalence of ACR criteria & sub-criteria within discovery cohort**

| Criterion/sub-criterion | Severe Disease |            |           | Less Severe Disease |            |           |
|-------------------------|----------------|------------|-----------|---------------------|------------|-----------|
|                         | Absent         | Present    | Missing   | Absent              | Present    | Missing   |
| Malar Rash              | 219 (42.2)     | 262 (50.5) | 38 (7.3)  | 309 (40.8)          | 368 (48.5) | 81 (10.7) |
| Discoid Rash            | 418 (80.5)     | 81 (15.6)  | 20 (3.9)  | 564 (74.4)          | 156 (20.6) | 38 (5)    |
| Photosensitivity        | 276 (53.2)     | 203 (39.1) | 40 (7.7)  | 290 (38.3)          | 429 (56.6) | 39 (5.1)  |
| Oral Ulcer              | 316 (60.9)     | 152 (29.3) | 51 (9.8)  | 454 (59.9)          | 232 (30.6) | 72 (9.5)  |
| Arthritis               | 91 (17.5)      | 360 (69.4) | 68 (13.1) | 83 (10.9)           | 580 (76.5) | 95 (12.5) |
| Pericarditis            | 404 (77.8)     | 112 (21.6) | 3 (0.6)   | 672 (88.7)          | 84 (11.1)  | 2 (0.3)   |
| Pleuritis               | 318 (61.3)     | 196 (37.8) | 5 (1)     | 553 (73)            | 185 (24.4) | 20 (2.6)  |
| Hemolytic Anemia        | 461 (88.8)     | 57 (11)    | 1 (0.2)   | 732 (96.6)          | 24 (3.2)   | 2 (0.2)   |
| Leukopenia              | 333 (64.2)     | 173 (33.3) | 13 (2.5)  | 491 (64.8)          | 259 (34.2) | 8 (1.1)   |
| Lymphopenia             | 311 (59.9)     | 199 (38.3) | 9 (1.7)   | 497 (65.6)          | 259 (34.2) | 2 (0.3)   |
| Thrombocytopenia        | 425 (81.9)     | 89 (17.1)  | 5 (1)     | 659 (86.9)          | 95 (12.5)  | 4 (0.5)   |
| Renal Disorder          | 140 (27)       | 351 (67.6) | 28 (5.4)  | 605 (79.8)          | 104 (13.7) | 49 (6.5)  |
| Seizures                | 441 (85)       | 77 (14.8)  | 1 (0.2)   | 724 (95.5)          | 31 (4.1)   | 3 (0.4)   |
| Psychosis               | 496 (95.6)     | 21 (4)     | 2 (0.4)   | 741 (97.8)          | 16 (2.1)   | 1 (0.1)   |
| Immuno. Disorder        | 57 (11)        | 457 (88.1) | 5 (1)     | 193 (25.5)          | 556 (73.4) | 9 (1.2)   |

**Supplementary Table 3.2: Prevalence of ACR criteria & sub-criteria within validation cohort**

| Criterion/sub-criterion | Severe Disease |            |           | Less Severe Disease |            |           |
|-------------------------|----------------|------------|-----------|---------------------|------------|-----------|
|                         | Absent         | Present    | Missing   | Absent              | Present    | Missing   |
| Malar Rash              | 122 (44.5)     | 134 (48.9) | 18 (6.6)  | 172 (47.3)          | 173 (47.5) | 19 (5.2)  |
| Discoid Rash            | 219 (79.9)     | 37 (13.5)  | 18 (6.6)  | 291 (79.9)          | 53 (14.6)  | 20 (5.5)  |
| Photosensitivity        | 135 (49.3)     | 121 (44.2) | 18 (6.6)  | 145 (39.8)          | 198 (54.4) | 21 (5.8)  |
| Oral Ulcer              | 173 (63.1)     | 72 (26.3)  | 29 (10.6) | 213 (58.5)          | 119 (32.7) | 32 (8.8)  |
| Arthritis               | 47 (17.2)      | 180 (65.7) | 47 (17.2) | 28 (7.7)            | 294 (80.8) | 42 (11.5) |
| Pericarditis            | 203 (74.1)     | 69 (25.2)  | 2 (0.7)   | 327 (89.8)          | 36 (9.9)   | 1 (0.3)   |
| Pleuritis               | 162 (59.1)     | 110 (40.1) | 2 (0.7)   | 274 (75.3)          | 81 (22.3)  | 9 (2.5)   |
| Hemolytic Anemia        | 244 (89.1)     | 29 (10.6)  | 1 (0.4)   | 353 (97)            | 10 (2.7)   | 1 (0.3)   |
| Leukopenia              | 273 (99.6)     | 1 (0.4)    | 0 (0)     | 361 (99.2)          | 2 (0.5)    | 1 (0.3)   |
| Lymphopenia             | 173 (63.1)     | 99 (36.1)  | 2 (0.7)   | 241 (66.2)          | 119 (32.7) | 4 (1.1)   |
| Thrombocytopenia        | 228 (83.2)     | 42 (15.3)  | 4 (1.5)   | 319 (87.6)          | 44 (12.1)  | 1 (0.3)   |
| Renal Disorder          | 75 (27.4)      | 183 (66.8) | 16 (5.8)  | 294 (80.8)          | 42 (11.5)  | 28 (7.7)  |
| Seizures                | 249 (90.9)     | 24 (8.8)   | 1 (0.4)   | 343 (94.2)          | 20 (5.5)   | 1 (0.3)   |
| Psychosis               | 262 (95.6)     | 9 (3.3)    | 3 (1.1)   | 359 (98.6)          | 5 (1.4)    | 0 (0)     |
| Immuno. Disorder        | 28 (10.2)      | 243 (88.7) | 3 (1.1)   | 89 (24.5)           | 270 (74.2) | 5 (1.4)   |
